# Supplementary material for: Hydrothermal Transformation of Eggshell Calcium Carbonate into Apatite Micro-Nanoparticles: Cytocompatibility and Osteoinductive Properties
Source: MDPI journal article supplement (doi:10.3390/nano13162299), 2023-08-10
Supplement: s1 [file s1]

# Hydrothermal Transformation of Eggshell Calcium Carbonate into Apatite Micro-Nanoparticles: Cytocompatibility and Osteoinductive Properties

**Adriana Torres-Mansilla <sup>1,2</sup>, Pedro Álvarez-Lloret <sup>1,\*</sup>, R. Fernández-Penas <sup>2</sup>, Annarita D'Urso <sup>3</sup>, Paula Alejandra Baldi3n <sup>4</sup>, Francesca Oltolina <sup>3</sup>, Antonia Follenzi <sup>3</sup>, Jaime G3mez-Morales <sup>2,\*</sup>**

<sup>1</sup> Departament of Geology, University of Oviedo, 33005 Oviedo, Spain

<sup>2</sup> Laboratory of Crystallographic Studies, IACT-CSIC-University of Granada, Avda. Las Palmeras, n3 4, 18100 Armilla, Spain

<sup>3</sup> Dipartimento di Scienze della Salute, Universit3 del Piemonte Orientale, "A. Avogadro" Via Solaroli, 17, 28100 Novara, Italy

<sup>4</sup> Departament of Oral Health, Faculty of Dentistry, National University of Colombia, Bogot3 111321, Colombia

\* Correspondence: pedroalvarez@uniovi.es (P.Á.-L.); jaime@lec.csic.es (J.G.-M.)

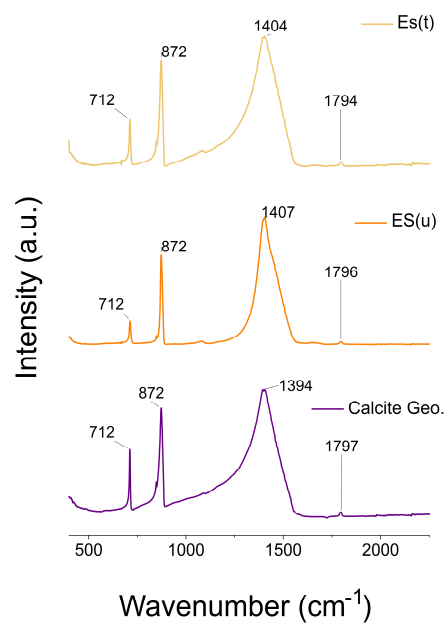

**Figure S1.** FTIR-ATR spectra of geogenic calcite (bottom), eggshell NaClO-untreated (ES(u) (middle) and NaClO-treated ES(t) (top)

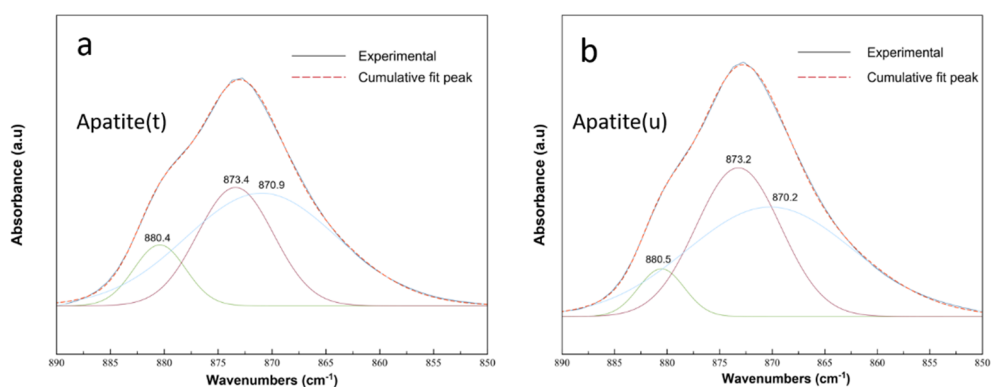

**Figure S2.** Deconvolution of the low-intensity FTIR absorption band centered at 873  $\text{cm}^{-1}$  in samples (a) apatite(t)- 200°C and (b) apatite(u)-200°C.
